# Supplementary material for: Cohabitación, matrimonio civil, divorciados casados de nuevo: doctrina y pastoral de la Iglesia
Source: Royal Society of Chemistry journal article supplement (doi:10.1039/d0dt01227k), 1984-01-01
Supplement: d0dt01227k1.pdf [file d0dt01227k1.pdf]

**Metal-metal bond formation of triplatinum cores with a silver(I) ion affording a heptanuclear cluster bearing four Pt–Ag bonds**

Natsuki Yabune, Hiroshi Nakajima and Takanori Nishioka\*

*Department of Chemistry, Graduate School of Science, Osaka City University, Osaka 558-8585, Japan.*

**Supplementary Information**

1. Experimental Procedures
2. X-ray crystallography
3. DFT calculations
4. References

## 1. Experimental Procedures

**General Procedures:** All chemicals were purchased from Sigma-Aldrich, Nacalai Tesque and Wako Pure Chemical Industries. All reagents and solvents were used as received. *cis*-[Pt(bisNHC-C1)(SH)<sub>2</sub>] (bisNHC-C1 = 1,1'-Dimethyl-3,3'-methylene-4-diimidazolilydene) was prepared according to the reported procedures.<sup>1</sup> *cis*-[Pt(bisNHC-C1)Cl<sub>2</sub>] was synthesised from the reaction of K<sub>2</sub>[PtCl<sub>4</sub>] and [(bisNHC-C1)H<sub>2</sub>](PF<sub>6</sub>)<sub>2</sub> in DMSO using a previously reported procedure.<sup>1</sup> <sup>1</sup>H NMR spectra were recorded on a Bruker AVANCE 300 FT-NMR spectrometer. Chemical shifts ( $\delta$  in ppm, coupling constants *J* in Hz) for <sup>1</sup>H NMR signals are expressed from SiMe<sub>4</sub> and referenced to residual solvent resonances.

### Synthesis of [{Pt(bisNHC-C1)}<sub>3</sub>( $\mu_3$ -S)<sub>2</sub>](OTf)<sub>2</sub>

A mixture of *cis*-[Pt(bisNHC-C1)(SH)<sub>2</sub>] (0.11 g, 0.25 mmol), *cis*-[Pt(bisNHC-C1)Cl<sub>2</sub>] (0.22 g, 0.50 mmol) and KHCO<sub>3</sub> (1.1 g, 11 mmol) as a proton scavenger in DMSO (30 mL) was stirred for 20 min to give a yellow mixture, which was heated at 60 °C for 4 h to afford a pale-yellow mixture. The solvent was removed under reduced pressure to give a pale-yellow solid. The solid was re-dissolved in water and added a solution of NaOTf (0.86 g 5.0 mmol) in water (3 mL) to give a slightly hygroscopic white solid, which was collected by suction filtration and washed with water. Yield: 0.20 g, 54%. The product was purified by recrystallisation from a solution in CH<sub>3</sub>CN by the addition of Et<sub>2</sub>O. Single crystals suitable for X-ray crystallography were obtained from a solution of a crude product, which contained a small amount of Cl<sup>-</sup> as counter anions, in CH<sub>3</sub>CN by diffusion of MeOH as [Pt(bisNHC-C1)]<sub>3</sub>( $\mu_3$ -S)<sub>2</sub>Cl(OTf). Anal. Calcd for [Pt(bisNHC-C1)]<sub>3</sub>( $\mu_3$ -S)<sub>2</sub>(OTf)<sub>2</sub>•0.5H<sub>2</sub>O (C<sub>29</sub>H<sub>37</sub>F<sub>6</sub>N<sub>12</sub>O<sub>6.5</sub>Pt<sub>3</sub>S<sub>4</sub>): C, 23.45; H, 2.51; N, 11.32. Found: C, 23.60; H, 32.75; N, 11.21. <sup>1</sup>H NMR (CD<sub>3</sub>CN, 300 MHz, 243 K): *C<sub>s</sub>* isomer:  $\delta$  7.24 (d, <sup>3</sup>*J*<sub>H-H</sub> = 2.0 Hz, 2H, im), 7.20 (d, <sup>3</sup>*J*<sub>H-H</sub> = 2.0 Hz, 2H, im), 7.16 (d, <sup>3</sup>*J*<sub>H-H</sub> = 2.0 Hz, 2H, im), 7.09 (d, <sup>3</sup>*J*<sub>H-H</sub> = 2.0 Hz, 2H, im), 7.04 (d, <sup>3</sup>*J*<sub>H-H</sub> = 2.0 Hz, 2H, im), 6.94 (d, <sup>3</sup>*J*<sub>H-H</sub> = 2.0 Hz, 2H, im), 5.82–5.69 (N-CH<sub>2</sub>), 3.94 (s, 6H, N-Me), 3.88 (s, 6H, N-Me), 3.57 (s, 6H, N-Me). *C<sub>3h</sub>* isomer:  $\delta$  7.20 (d, <sup>3</sup>*J*<sub>H-H</sub> = 2.0

Hz, 6H, im), 6.99 (d,  $^3J_{\text{H-H}} = 2.0$  Hz, 6H, im), 5.82–5.69 (N-CH<sub>2</sub>), 3.74 (s, 18H, N-Me).

### Synthesis of [Ag{[Pt(bisNHC-C1)]<sub>3</sub>( $\mu_3$ -S)<sub>2</sub>]}<sub>2</sub>(OTf)<sub>4</sub>(PF<sub>6</sub>)

A solution of AgOTf (0.069 g, 0.027 mmol) in CH<sub>3</sub>CN (1 mL) was added to a solution of [Pt(bisNHC-C1)]<sub>3</sub>( $\mu_3$ -S)<sub>2</sub>(OTf)<sub>2</sub> (0.074 g, 0.050 mmol) in CH<sub>3</sub>CN (2 mL). The solution was stirred for 30 min to give a white solid. The white solid was removed by filtration using a membrane filter. Diethyl ether was added to the filtrate to afford a yellow solid, which was collected by suction filtration and washed with diethyl ether. Yield: 0.034 g, 43%. The pure sample used for elemental analysis was obtained from a crude product, which contains a small amount of PF<sub>6</sub><sup>-</sup> as impurity originated from the ligand precursor used as a starting material to prepare the chloro complex, by recrystallisation three times from a solution in CH<sub>3</sub>CN by the addition of Et<sub>2</sub>O. Repeated recrystallisation probably concentrates PF<sub>6</sub><sup>-</sup> anions due to low solubility of the salt containing PF<sub>6</sub><sup>-</sup> ions. A few number of single crystals suitable for X-ray crystallography were obtained from a solution of a crude product in CH<sub>3</sub>CN by diffusion of Et<sub>2</sub>O as [Ag{[Pt(bisNHC-C1)]<sub>3</sub>( $\mu_3$ -S)<sub>2</sub>]}<sub>2</sub>(OTf)<sub>3</sub>(PF<sub>6</sub>)<sub>2</sub>. Anal. Calcd for C<sub>58</sub>H<sub>72</sub>AgF<sub>18</sub>N<sub>24</sub>O<sub>12</sub>PPt<sub>6</sub>S<sub>8</sub>: C, 21.73; H, 2.26; N, 10.49. Found: C, 21.91; H, 2.42; N, 10.41. <sup>1</sup>H NMR (CD<sub>3</sub>CN, 300 MHz, 298 K):  $\delta$  7.35 (dd,  $^3J_{\text{H-H}} = 2.0$  Hz,  $^3J_{\text{H-H}} = 2.0$  Hz, 4H, im), 7.20 (t,  $^3J_{\text{H-H}} = 2.0$  Hz, 2H, im), 7.04 (t,  $^3J_{\text{H-H}} = 1.6$  Hz, 2H, im), 6.99 (d,  $^3J_{\text{H-H}} = 2.0$  Hz, 2H, im), 6.98 (d,  $^3J_{\text{H-H}} = 1.9$  Hz, 2H, im), 8.39 (d,  $^3J_{\text{H-H}} = 1.9$  Hz, 2H, im), 6.84 (d,  $^3J_{\text{H-H}} = 1.9$  Hz, 2H, im), 6.77 (d,  $^3J_{\text{H-H}} = 2.0$  Hz, 2H, im), 6.34 (d,  $^2J_{\text{H-H}} = 13.1$  Hz, 2H, N-CH<sub>2</sub>), 6.18 (d,  $^2J_{\text{H-H}} = 13.2$  Hz, 2H, N-CH<sub>2</sub>), 5.90–5.79 (N-CH<sub>2</sub>), 4.06 (s, 6H, N-Me), 4.01 (s, 6H, N-Me), 3.95 (s, 6H, N-Me), 3.94 (s, 6H, N-Me), 3.49 (s, 6H, N-Me), 3.46 (s, 6H, N-Me).

## 2. X-ray crystallography

Each single crystal of [1]Cl(OTf) and [2](OTf)<sub>3</sub>(PF<sub>6</sub>)<sub>2</sub> was mounted on a loop using Paratone. Diffraction data were collected on a Rigaku Varimax Saturn724 diffractometer using a rotation method with 0.5° frame widths.

The data were integrated, scaled, sorted, and averaged using the CrystalClear<sup>2</sup> software. Absorption corrections were applied using the multi-scan method. The structures were solved using SIR97<sup>3</sup> and refined with SHELXL97<sup>4</sup> using the CrystalStructure software.<sup>5</sup> All hydrogen atoms were located at the calculated positions and refined as riding models. Crystallographic data are summarised in Tables S1 and S2 for [1]Cl(OTf) and [2](OTf)<sub>3</sub>(PF<sub>6</sub>)<sub>2</sub>, respectively.

**Table S1.** Crystallographic data of triplatinum complex [1]Cl(OTf).

|                                                         |                                                                                                                |
|---------------------------------------------------------|----------------------------------------------------------------------------------------------------------------|
| Formula                                                 | C <sub>28</sub> H <sub>36</sub> ClF <sub>3</sub> N <sub>12</sub> O <sub>3</sub> Pt <sub>3</sub> S <sub>3</sub> |
| <i>M<sub>w</sub></i>                                    | 1362.57                                                                                                        |
| Crystal description                                     | colourless, prism                                                                                              |
| Crystal size/mm                                         | 0.126 × 0.096 × 0.091                                                                                          |
| Crystal system                                          | <i>monoclinic</i>                                                                                              |
| Space group                                             | <i>C2/c</i> (#15)                                                                                              |
| <i>a</i> /Å                                             | 38.466(7)                                                                                                      |
| <i>b</i> /Å                                             | 18.519(3)                                                                                                      |
| <i>c</i> /Å                                             | 28.967(5)                                                                                                      |
| <i>β</i> <sup>o</sup>                                   | 113.9235(16)                                                                                                   |
| <i>V</i> /Å <sup>3</sup>                                | 18862(6)                                                                                                       |
| <i>Z</i>                                                | 16                                                                                                             |
| <i>F</i> (000)                                          | 10208.00                                                                                                       |
| <i>ρ</i> <sub>calcd</sub> /g cm <sup>-1</sup>           | 1.919                                                                                                          |
| <i>μ</i> /mm <sup>-1</sup>                              | 9.084                                                                                                          |
| Total reflections                                       | 95400                                                                                                          |
| Unique reflections ( <i>R</i> <sub>int</sub> )          | 21456 (0.0401)                                                                                                 |
| Scan range <i>θ</i> <sup>o</sup>                        | 27.450                                                                                                         |
| Completeness                                            | 0.995                                                                                                          |
| Index ranges                                            | -49 ≤ <i>h</i> ≤ 49<br>-23 ≤ <i>k</i> ≤ 23<br>-37 ≤ <i>l</i> ≤ 37                                              |
| Data/restraints/para.                                   | 21456/0/974                                                                                                    |
| R1 [ <i>I</i> > 2σ( <i>I</i> )], <i>wR</i> 2 (all data) | 0.0651, 0.1813                                                                                                 |
| GOF on <i>F</i> <sup>2</sup>                            | 1.095                                                                                                          |

|                                          |             |
|------------------------------------------|-------------|
| Max./min. $\rho/\text{e}\text{\AA}^{-3}$ | 2.94/−2.41  |
| Min./max. T                              | 0.350/0.438 |

**Table S2.** Crystallographic data of heptanuclear cluster [2](OTf)<sub>3</sub>(PF<sub>6</sub>)<sub>2</sub>.

|                                          |                                                                                                                              |
|------------------------------------------|------------------------------------------------------------------------------------------------------------------------------|
| Formula                                  | C <sub>57</sub> H <sub>72</sub> F <sub>21</sub> N <sub>14</sub> O <sub>9</sub> P <sub>2</sub> Pt <sub>6</sub> S <sub>7</sub> |
| $M_w$                                    | 3201.09                                                                                                                      |
| Crystal description                      | yellow, prism                                                                                                                |
| Crystal size/mm                          | 0.090 × 0.060 × 0.060                                                                                                        |
| Crystal system                           | <i>monoclinic</i>                                                                                                            |
| Space group                              | <i>C2/c</i> (#15)                                                                                                            |
| $a/\text{\AA}$                           | 22.410(3)                                                                                                                    |
| $b/\text{\AA}$                           | 22.131(3)                                                                                                                    |
| $c/\text{\AA}$                           | 18.447(3)                                                                                                                    |
| $\beta^\circ$                            | 108.832(2)                                                                                                                   |
| $V/\text{\AA}^3$                         | 8659(2)                                                                                                                      |
| $Z$                                      | 4                                                                                                                            |
| $F(000)$                                 | 6000.00                                                                                                                      |
| $\rho_{\text{calcd}}/\text{g cm}^{-3}$   | 2.455                                                                                                                        |
| $\mu/\text{mm}^{-1}$                     | 10.153                                                                                                                       |
| Total reflections                        | 35559                                                                                                                        |
| Unique reflections ( $R_{\text{int}}$ )  | 9844 (0.0261)                                                                                                                |
| Scan range $\theta^\circ$                | 27.48                                                                                                                        |
| Completeness                             | 0.989                                                                                                                        |
| Index ranges                             | $-28 \leq h \leq 28$<br>$-28 \leq k \leq 28$<br>$-23 \leq l \leq 23$                                                         |
| Data/restraints/para.                    | 9844/0/578                                                                                                                   |
| R1 [ $I > 2\sigma(I)$ ], wR2 (all data)  | 0.0377, 0.0952                                                                                                               |
| GOF on $F^2$                             | 1.054                                                                                                                        |
| Max./min. $\rho/\text{e}\text{\AA}^{-3}$ | 3.64/−1.55                                                                                                                   |
| Min./max. T                              | 0.403/0.544                                                                                                                  |

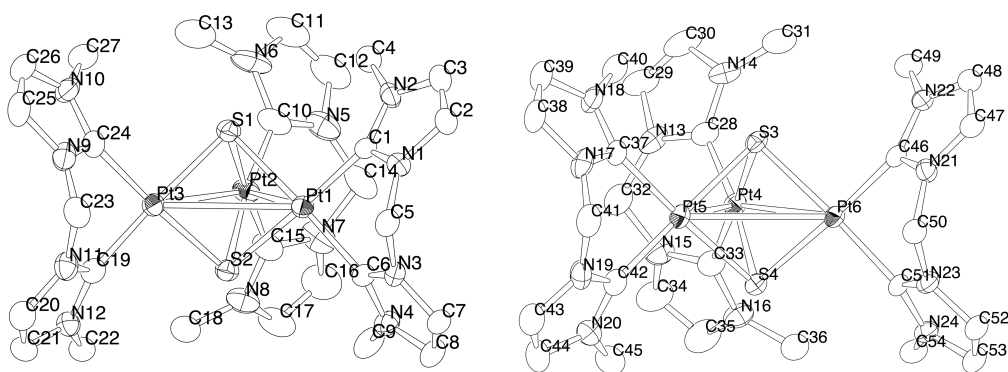

**Fig. S-1** Atom numbering for [1]Cl(OTf)

**Table S3.** Selected bond distances for [1]Cl(OTf).

| Atoms   | Distance/Å | Atoms   | Distance/Å |
|---------|------------|---------|------------|
| Pt1–Pt2 | 2.9734(9)  | Pt1–Pt3 | 3.1824(7)  |
| Pt1–S1  | 2.376(3)   | Pt1–S2  | 2.372(3)   |
| Pt1–C1  | 2.030(11)  | Pt1–C6  | 2.025(12)  |
| Pt2–Pt3 | 3.3233(8)  | Pt2–S1  | 2.375(3)   |
| Pt2–S2  | 2.370(3)   | Pt2–C10 | 1.992(19)  |
| Pt2–C15 | 1.986(13)  | Pt3–S1  | 2.354(3)   |
| Pt3–S2  | 2.349(2)   | Pt3–C19 | 2.023(13)  |
| Pt3–C24 | 2.009(11)  | Pt4–Pt5 | 2.9525(8)  |
| Pt4–Pt6 | 3.3184(8)  | Pt4–S3  | 2.374(3)   |
| Pt4–S4  | 2.377(3)   | Pt4–C28 | 2.007(14)  |
| Pt4–C33 | 2.009(13)  | Pt5–Pt6 | 3.2391(6)  |
| Pt5–S3  | 2.368(3)   | Pt5–S4  | 2.382(2)   |
| Pt5–C37 | 2.002(9)   | Pt5–C42 | 2.016(13)  |
| Pt6–S3  | 2.351(3)   | Pt6–S4  | 2.360(3)   |
| Pt6–C46 | 2.011(11)  | Pt6–C51 | 2.036(9)   |

**Table S4.** Selected bond angles for [1]Cl(OTf).

| Atoms       | Angle/°    | Atoms       | Angle/°    |
|-------------|------------|-------------|------------|
| Pt2–Pt1–Pt3 | 65.247(18) | Pt2–Pt1–S1  | 51.24(8)   |
| Pt2–Pt1–S2  | 51.13(8)   | Pt2–Pt1–C1  | 125.8(4)   |
| Pt2–Pt1–C6  | 125.4(4)   | Pt3–Pt1–S1  | 47.42(7)   |
| Pt3–Pt1–S2  | 47.30(6)   | Pt3–Pt1–C1  | 131.3(3)   |
| Pt3–Pt1–C6  | 131.0(3)   | S1–Pt1–S2   | 78.27(10)  |
| S1–Pt1–C1   | 98.7(3)    | S1–Pt1–C6   | 176.3(4)   |
| S2–Pt1–C1   | 176.7(4)   | S2–Pt1–C6   | 98.3(3)    |
| C1–Pt1–C6   | 84.6(5)    | Pt1–Pt2–Pt3 | 60.413(19) |

|             |            |             |            |
|-------------|------------|-------------|------------|
| Pt1-Pt2-S1  | 51.26(9)   | Pt1-Pt2-S2  | 51.20(7)   |
| Pt1-Pt2-C10 | 120.5(5)   | Pt1-Pt2-C15 | 122.3(5)   |
| Pt3-Pt2-S1  | 45.09(7)   | Pt3-Pt2-S2  | 44.96(6)   |
| Pt3-Pt2-C10 | 136.5(4)   | Pt3-Pt2-C15 | 134.1(4)   |
| S1-Pt2-S2   | 78.33(11)  | S1-Pt2-C10  | 98.4(4)    |
| S1-Pt2-C15  | 173.5(5)   | S2-Pt2-C10  | 171.3(5)   |
| S2-Pt2-C15  | 97.5(5)    | C10-Pt2-C15 | 85.1(6)    |
| Pt1-Pt3-Pt2 | 54.340(14) | Pt1-Pt3-S1  | 48.00(8)   |
| Pt1-Pt3-S2  | 47.93(7)   | Pt1-Pt3-C19 | 128.3(4)   |
| Pt1-Pt3-C24 | 129.5(4)   | Pt2-Pt3-S1  | 45.61(7)   |
| Pt2-Pt3-S2  | 45.49(8)   | Pt2-Pt3-C19 | 135.1(3)   |
| Pt2-Pt3-C24 | 131.4(4)   | S1-Pt3-S2   | 79.17(9)   |
| S1-Pt3-C19  | 176.0(4)   | S1-Pt3-C24  | 97.2(4)    |
| S2-Pt3-C19  | 99.2(3)    | S2-Pt3-C24  | 176.4(4)   |
| C19-Pt3-C24 | 84.4(5)    | Pt5-Pt4-Pt6 | 61.873(15) |
| Pt5-Pt4-S3  | 51.39(7)   | Pt5-Pt4-S4  | 51.72(5)   |
| Pt5-Pt4-C28 | 119.1(3)   | Pt5-Pt4-C33 | 122.7(4)   |
| Pt6-Pt4-S3  | 45.10(6)   | Pt6-Pt4-S4  | 45.32(7)   |
| Pt6-Pt4-C28 | 135.8(4)   | Pt6-Pt4-C33 | 133.8(4)   |
| S3-Pt4-S4   | 77.97(9)   | S3-Pt4-C28  | 97.9(3)    |
| S3-Pt4-C33  | 174.1(4)   | S4-Pt4-C28  | 170.6(3)   |
| S4-Pt4-C33  | 97.8(4)    | C28-Pt4-C33 | 85.6(5)    |
| Pt4-Pt5-Pt6 | 64.624(14) | Pt4-Pt5-S3  | 51.59(7)   |
| Pt4-Pt5-S4  | 51.58(8)   | Pt4-Pt5-C37 | 121.0(4)   |
| Pt4-Pt5-C42 | 126.1(4)   | Pt6-Pt5-S3  | 46.43(6)   |
| Pt6-Pt5-S4  | 46.63(6)   | Pt6-Pt5-C37 | 132.5(3)   |
| Pt6-Pt5-C42 | 133.0(3)   | S3-Pt5-S4   | 78.01(8)   |
| S3-Pt5-C37  | 96.9(3)    | S3-Pt5-C42  | 177.7(4)   |
| S4-Pt5-C37  | 172.6(4)   | S4-Pt5-C42  | 100.1(3)   |
| C37-Pt5-C42 | 84.8(4)    | Pt4-Pt6-Pt5 | 53.503(16) |
| Pt4-Pt6-S3  | 45.67(7)   | Pt4-Pt6-S4  | 45.74(7)   |
| Pt4-Pt6-C46 | 134.0(3)   | Pt4-Pt6-C51 | 132.4(3)   |
| Pt5-Pt6-S3  | 46.87(7)   | Pt5-Pt6-S4  | 47.19(5)   |
| Pt5-Pt6-C46 | 128.6(2)   | Pt5-Pt6-C51 | 130.5(3)   |
| S3-Pt6-S4   | 78.77(9)   | S3-Pt6-C46  | 98.6(3)    |
| S3-Pt6-C51  | 177.0(3)   | S4-Pt6-C46  | 175.8(2)   |
| S4-Pt6-C51  | 98.4(3)    | C46-Pt6-C51 | 84.3(4)    |
| Pt1-S1-Pt2  | 77.50(8)   | Pt1-S1-Pt3  | 84.58(11)  |
| Pt2-S1-Pt3  | 89.30(10)  | Pt1-S2-Pt2  | 77.66(8)   |
| Pt1-S2-Pt3  | 84.77(8)   | Pt2-S2-Pt3  | 89.55(10)  |
| Pt4-S3-Pt5  | 77.02(8)   | Pt4-S3-Pt6  | 89.22(7)   |
| Pt5-S3-Pt6  | 86.70(9)   | Pt4-S4-Pt5  | 76.70(7)   |
| Pt4-S4-Pt6  | 88.95(9)   | Pt5-S4-Pt6  | 86.18(8)   |

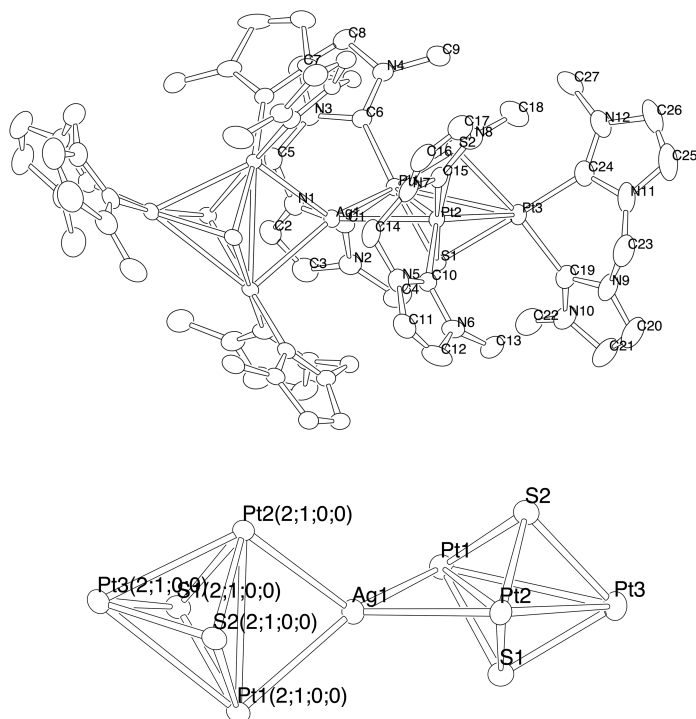

**Fig. S-2** Atom numbering for  $[2](\text{OTf})_3(\text{PF}_6)_2$

**Table S5.** Selected bond distances for  $[2](\text{OTf})_3(\text{PF}_6)_2$ .

| Atoms   | Distance/Å | Atoms   | Distance/Å |
|---------|------------|---------|------------|
| Pt1–Ag1 | 2.8138(4)  | Pt1–S1  | 2.3580(19) |
| Pt1–S2  | 2.3544(16) | Pt1–C1  | 2.027(7)   |
| Pt1–C6  | 2.035(7)   | Pt2–Pt3 | 2.9109(5)  |
| Pt2–Ag1 | 2.7741(5)  | Pt2–S1  | 2.3908(16) |
| Pt2–S2  | 2.3691(15) | Pt2–C10 | 2.004(6)   |
| Pt2–C15 | 2.019(7)   | Pt3–S1  | 2.3816(16) |
| Pt3–S2  | 2.3733(18) | Pt3–C19 | 2.007(9)   |

**Table S6.** Selected bond angles for  $[2](\text{OTf})_3(\text{PF}_6)_2$ .

| Atoms       | Angle/°     | Atoms       | Angle/°    |
|-------------|-------------|-------------|------------|
| Ag1–Pt1–S1  | 74.44(4)    | Ag1–Pt1–S2  | 88.85(4)   |
| Ag1–Pt1–C1  | 90.36(18)   | Ag1–Pt1–C6  | 105.78(18) |
| S1–Pt1–S2   | 78.45(6)    | S1–Pt1–C1   | 98.8(2)    |
| S1–Pt1–C6   | 175.81(19)  | S2–Pt1–C1   | 177.3(2)   |
| S2–Pt1–C6   | 97.36(19)   | C1–Pt1–C6   | 85.4(3)    |
| Pt3–Pt2–Ag1 | 117.362(16) | Pt3–Pt2–S1  | 52.27(4)   |
| Pt3–Pt2–S2  | 52.20(4)    | Pt3–Pt2–C10 | 122.4(2)   |
| Pt3–Pt2–C15 | 124.38(18)  | Ag1–Pt2–S1  | 74.73(5)   |



|              |             |              |             |
|--------------|-------------|--------------|-------------|
| Ag1–Pt2–S2   | 89.51(4)    | Ag1–Pt2–C10  | 94.2(2)     |
| Ag1–Pt2–C15  | 106.2(2)    | S1–Pt2–S2    | 77.52(5)    |
| S1–Pt2–C10   | 99.7(2)     | S1–Pt2–C15   | 175.56(18)  |
| S2–Pt2–C10   | 174.6(2)    | S2–Pt2–C15   | 98.11(18)   |
| C10–Pt2–C15  | 84.6(3)     | Pt2–Pt3–S1   | 52.56(4)    |
| Pt2–Pt3–S2   | 52.07(3)    | Pt2–Pt3–C19  | 119.97(19)  |
| Pt2–Pt3–C24  | 118.4(2)    | S1–Pt3–S2    | 77.61(6)    |
| S1–Pt3–C19   | 96.5(2)     | S1–Pt3–C24   | 170.6(2)    |
| S2–Pt3–C19   | 171.96(19)  | S2–Pt3–C24   | 98.7(3)     |
| C19–Pt3–C24  | 86.3(3)     | Pt1–Ag1–Pt1* | 141.66(3)   |
| Pt1–Ag1–Pt2  | 72.283(12)  | Pt1–Ag1–Pt2* | 128.381(12) |
| Pt1*–Ag1–Pt2 | 128.381(12) | Pt2–Ag1–Pt2* | 122.36(3)   |
| Pt1–S1–Pt2   | 87.90(6)    | Pt1–S1–Pt3   | 89.14(5)    |
| Pt2–S1–Pt3   | 75.17(5)    | Pt1–S2–Pt2   | 88.49(5)    |
| Pt1–S2–Pt3   | 89.42(6)    | Pt2–S2–Pt3   | 75.73(5)    |

### 3. DFT calculations

DFT calculations were carried out on triplatinum complex cation  $[1]^{2+}$  and heptanuclear cluster  $[2]^{5+}$  using Gaussian03.<sup>6</sup> Atomic coordinates were optimised at the level of B3LYP/LanL2DZ. Structural optimisations were started from the structures obtained from crystallographic analyses. Vibrational frequencies were calculated for all converged structures, and no imaginary frequencies appeared showing that these structures lie on minima.

**Table S7.** Optimised atomic coordinates of triplatinum complex  $[1]^{2+}$  obtained from DFT calculations

| Number | Atom | x         | y         | z         |
|--------|------|-----------|-----------|-----------|
| 1      | Pt   | -0.162053 | 1.733422  | -0.007849 |
| 2      | Pt   | 1.853510  | -0.835834 | -0.001239 |
| 3      | Pt   | -1.664627 | -1.161456 | 0.006396  |
| 4      | S    | 0.016195  | -0.214267 | -1.576693 |
| 5      | S    | 0.023400  | -0.202551 | 1.575928  |
| 6      | N    | -1.285436 | 4.217501  | -1.220668 |
| 7      | N    | 0.214746  | 3.444567  | -2.597702 |
| 8      | N    | -1.278672 | 4.232287  | 1.179655  |
| 9      | N    | 0.229127  | 3.477597  | 2.558395  |
| 10     | N    | 4.594441  | -0.714891 | -1.177468 |
| 11     | N    | 3.364606  | -1.878087 | -2.547151 |
| 12     | N    | 4.573961  | -0.695601 | 1.219177  |
| 13     | N    | 3.320383  | -1.856946 | 2.568853  |
| 14     | N    | -4.366770 | -1.534432 | -1.206722 |
| 15     | N    | -2.920858 | -2.454716 | -2.549078 |
| 16     | N    | -4.382148 | -1.507042 | 1.191386  |
| 17     | N    | -2.957342 | -2.393146 | 2.578614  |

|    |   |           |           |           |
|----|---|-----------|-----------|-----------|
| 18 | C | -0.391025 | 3.174200  | -1.394957 |
| 19 | C | -1.239781 | 5.117943  | -2.297957 |
| 20 | H | -1.857805 | 5.998772  | -2.361305 |
| 21 | C | -0.301067 | 4.625290  | -3.164269 |
| 22 | H | 0.039509  | 5.008874  | -4.112253 |
| 23 | C | 1.279812  | 2.648504  | -3.231067 |
| 24 | H | 0.881893  | 2.098892  | -4.089751 |
| 25 | H | 1.667566  | 1.933433  | -2.506272 |
| 26 | H | 2.082721  | 3.315332  | -3.561913 |
| 27 | C | -2.117542 | 4.318075  | -0.018684 |
| 28 | H | -2.651922 | 5.270399  | -0.023004 |
| 29 | H | -2.838196 | 3.494792  | -0.011590 |
| 30 | C | -0.384044 | 3.190507  | 1.363143  |
| 31 | C | -1.225407 | 5.148051  | 2.243586  |
| 32 | H | -1.842590 | 6.030058  | 2.298295  |
| 33 | C | -0.281910 | 4.667001  | 3.111056  |
| 34 | H | 0.064888  | 5.063707  | 4.051369  |
| 35 | C | 1.300372  | 2.693198  | 3.195302  |
| 36 | H | 2.126924  | 3.358660  | 3.465651  |
| 37 | H | 1.648898  | 1.934984  | 2.495054  |
| 38 | H | 0.921124  | 2.196523  | 4.093878  |
| 39 | C | 3.302487  | -1.181229 | -1.364834 |
| 40 | C | 4.665405  | -1.843645 | -3.084284 |
| 41 | H | 4.922395  | -2.332719 | -4.009854 |
| 42 | C | 5.442805  | -1.117409 | -2.222547 |
| 43 | H | 6.487995  | -0.858216 | -2.271048 |
| 44 | C | 2.261271  | -2.636424 | -3.157477 |
| 45 | H | 2.467248  | -3.710721 | -3.096835 |
| 46 | H | 2.147701  | -2.346183 | -4.206820 |
| 47 | H | 1.343901  | -2.403511 | -2.618991 |
| 48 | C | 4.963234  | 0.049560  | 0.017850  |
| 49 | H | 4.440054  | 1.010554  | 0.005968  |
| 50 | H | 6.041705  | 0.220231  | 0.025563  |
| 51 | C | 3.282615  | -1.169429 | 1.380673  |
| 52 | C | 5.399229  | -1.079314 | 2.289558  |
| 53 | H | 6.441998  | -0.815322 | 2.358957  |
| 54 | C | 4.605942  | -1.802534 | 3.139908  |
| 55 | H | 4.844460  | -2.279498 | 4.076594  |
| 56 | C | 2.194856  | -2.591223 | 3.168881  |
| 57 | H | 1.462999  | -2.803620 | 2.389574  |
| 58 | H | 1.720698  | -1.991568 | 3.952048  |
| 59 | H | 2.560938  | -3.530962 | 3.593408  |
| 60 | C | -3.027969 | -1.733233 | 1.376640  |
| 61 | C | -5.138005 | -2.012262 | 2.262601  |
| 62 | H | -6.212034 | -1.939047 | 2.316882  |
| 63 | C | -4.238582 | -2.562469 | 3.135827  |
| 64 | H | -4.398453 | -3.055437 | 4.080920  |
| 65 | C | -1.728616 | -2.900746 | 3.207843  |
| 66 | H | -0.922500 | -2.854602 | 2.476576  |

|    |   |           |           |           |
|----|---|-----------|-----------|-----------|
| 67 | H | -1.881608 | -3.937523 | 3.524270  |
| 68 | H | -1.463344 | -2.286202 | 4.074043  |
| 69 | C | -4.891115 | -0.855303 | -0.018637 |
| 70 | H | -5.982276 | -0.897754 | -0.024970 |
| 71 | H | -4.565928 | 0.189247  | -0.028619 |
| 72 | C | -3.010569 | -1.764390 | -1.365950 |
| 73 | C | -5.106360 | -2.066645 | -2.276209 |
| 74 | H | -6.179500 | -1.996245 | -2.348290 |
| 75 | C | -4.193389 | -2.638006 | -3.121669 |
| 76 | H | -4.338883 | -3.154413 | -4.056444 |
| 77 | C | -1.679031 | -2.968853 | -3.147659 |
| 78 | H | -0.923009 | -3.047266 | -2.366142 |
| 79 | H | -1.321447 | -2.289576 | -3.927807 |
| 80 | H | -1.866315 | -3.958236 | -3.576027 |

**Table S8** Optimised atomic coordinates of heptanuclear cluster [2]<sup>5+</sup> obtained from DFT calculations

| Number | Atom | x         | y         | z         |
|--------|------|-----------|-----------|-----------|
| 1      | Pt   | 2.271989  | 1.379703  | 1.518873  |
| 2      | Pt   | 2.460830  | -1.127635 | -1.047146 |
| 3      | Pt   | 5.147116  | -0.102823 | 0.180290  |
| 4      | Ag   | -0.000559 | 0.156357  | 0.000575  |
| 5      | S    | 3.215291  | 1.254608  | -0.796718 |
| 6      | S    | 3.072823  | -0.987279 | 1.382286  |
| 7      | N    | 0.563653  | 3.778165  | 2.172206  |
| 8      | N    | 2.332082  | 4.501832  | 1.131429  |
| 9      | N    | 0.457806  | 2.068613  | 3.828274  |
| 10     | N    | 2.110897  | 0.897997  | 4.622954  |
| 11     | N    | 1.124952  | -1.900347 | -3.633973 |
| 12     | N    | 2.825913  | -0.627461 | -4.117466 |
| 13     | N    | 1.018859  | -3.607703 | -1.964663 |
| 14     | N    | 2.600115  | -4.221156 | -0.596340 |
| 15     | N    | 7.515514  | -0.328364 | -1.619654 |
| 16     | N    | 7.169456  | 1.796564  | -1.285828 |
| 17     | N    | 7.411592  | -2.038813 | 0.041446  |
| 18     | N    | 6.953803  | -1.744118 | 2.151060  |
| 19     | C    | 1.711455  | 3.343472  | 1.533756  |
| 20     | C    | 0.482971  | 5.179742  | 2.187320  |
| 21     | H    | -0.320503 | 5.723147  | 2.657762  |
| 22     | C    | 1.593219  | 5.631742  | 1.527080  |
| 23     | H    | 1.923511  | 6.638680  | 1.327554  |
| 24     | C    | 3.654372  | 4.607719  | 0.488282  |
| 25     | H    | 3.808147  | 3.745724  | -0.159077 |
| 26     | H    | 4.439560  | 4.651462  | 1.250521  |
| 27     | H    | 3.690386  | 5.523893  | -0.107492 |
| 28     | C    | -0.329359 | 2.847693  | 2.868366  |
| 29     | H    | -0.810299 | 2.180378  | 2.148507  |
| 30     | H    | -1.097935 | 3.411858  | 3.400225  |

|    |   |           |           |           |
|----|---|-----------|-----------|-----------|
| 31 | C | 1.589786  | 1.372944  | 3.443212  |
| 32 | C | 0.289493  | 2.046029  | 5.221954  |
| 33 | H | -0.515691 | 2.550155  | 5.731474  |
| 34 | C | 1.327253  | 1.304502  | 5.718215  |
| 35 | H | 1.580676  | 1.054913  | 6.736171  |
| 36 | C | 3.382720  | 0.169869  | 4.785780  |
| 37 | H | 4.218720  | 0.876828  | 4.804514  |
| 38 | H | 3.505077  | -0.532815 | 3.962490  |
| 39 | H | 3.361603  | -0.376058 | 5.732569  |
| 40 | C | 2.126163  | -1.143808 | -3.052502 |
| 41 | C | 1.203661  | -1.862848 | -5.035727 |
| 42 | H | 0.531731  | -2.403347 | -5.682818 |
| 43 | C | 2.267342  | -1.055777 | -5.336457 |
| 44 | H | 2.679089  | -0.774668 | -6.292809 |
| 45 | C | 4.046648  | 0.200009  | -4.059074 |
| 46 | H | 4.787339  | -0.204041 | -4.755865 |
| 47 | H | 4.446483  | 0.184664  | -3.046585 |
| 48 | H | 3.821428  | 1.234218  | -4.337355 |
| 49 | C | 0.221668  | -2.732426 | -2.831396 |
| 50 | H | -0.393561 | -3.342531 | -3.495983 |
| 51 | H | -0.428998 | -2.097353 | -2.224106 |
| 52 | C | 2.003212  | -3.105255 | -1.133237 |
| 53 | C | 1.008169  | -5.012159 | -1.953706 |
| 54 | H | 0.335470  | -5.606008 | -2.551330 |
| 55 | C | 1.996154  | -5.394202 | -1.086649 |
| 56 | H | 2.328205  | -6.379733 | -0.800968 |
| 57 | C | 3.758905  | -4.252072 | 0.317449  |
| 58 | H | 3.433152  | -4.447783 | 1.343567  |
| 59 | H | 4.270106  | -3.291041 | 0.286853  |
| 60 | H | 4.442583  | -5.044842 | -0.000197 |
| 61 | C | 6.668449  | 0.559088  | -0.979223 |
| 62 | C | 8.529633  | 0.350651  | -2.317328 |
| 63 | H | 9.302548  | -0.149444 | -2.879296 |
| 64 | C | 8.304018  | 1.685725  | -2.113581 |
| 65 | H | 8.852894  | 2.544965  | -2.465234 |
| 66 | C | 6.676976  | 3.082341  | -0.765731 |
| 67 | H | 5.943835  | 2.880535  | 0.014532  |
| 68 | H | 6.219724  | 3.668513  | -1.569646 |
| 69 | H | 7.511854  | 3.646710  | -0.339467 |
| 70 | C | 7.408074  | -1.776868 | -1.403529 |
| 71 | H | 6.475695  | -2.144445 | -1.840384 |
| 72 | H | 8.254496  | -2.282815 | -1.871381 |
| 73 | C | 6.550646  | -1.372332 | 0.895896  |
| 74 | C | 8.337044  | -2.817203 | 0.758366  |
| 75 | H | 9.103906  | -3.412518 | 0.288454  |
| 76 | C | 8.040834  | -2.637538 | 2.083075  |
| 77 | H | 8.512761  | -3.046479 | 2.962450  |
| 78 | C | 6.413134  | -1.230843 | 3.419963  |
| 79 | H | 5.892892  | -2.027505 | 3.961796  |

|     |    |           |           |           |
|-----|----|-----------|-----------|-----------|
| 80  | H  | 5.722958  | -0.418457 | 3.195427  |
| 81  | H  | 7.231887  | -0.850485 | 4.038338  |
| 82  | Pt | -2.274332 | 1.412316  | -1.488334 |
| 83  | Pt | -2.460049 | -1.154755 | 1.017739  |
| 84  | Pt | -5.145906 | -0.098743 | -0.184984 |
| 85  | S  | -3.215620 | 1.232987  | 0.826226  |
| 86  | S  | -3.074015 | -0.958088 | -1.407642 |
| 87  | N  | -0.562695 | 3.822710  | -2.084705 |
| 88  | N  | -2.329044 | 4.524475  | -1.025705 |
| 89  | N  | -0.462547 | 2.154341  | -3.782609 |
| 90  | N  | -2.119139 | 1.007023  | -4.604131 |
| 91  | N  | -1.122721 | -1.991430 | 3.583840  |
| 92  | N  | -2.821028 | -0.728051 | 4.099945  |
| 93  | N  | -1.018348 | -3.656872 | 1.872542  |
| 94  | N  | -2.600126 | -4.235236 | 0.489704  |
| 95  | N  | -7.500367 | -0.358684 | 1.628571  |
| 96  | N  | -7.158483 | 1.772340  | 1.330615  |
| 97  | N  | -7.411866 | -2.034412 | -0.068353 |
| 98  | N  | -6.972080 | -1.694467 | -2.175047 |
| 99  | C  | -1.711241 | 3.374939  | -1.456782 |
| 100 | C  | -0.477350 | 5.223890  | -2.062667 |
| 101 | H  | 0.327679  | 5.776798  | -2.519166 |
| 102 | C  | -1.586411 | 5.661981  | -1.391243 |
| 103 | H  | -1.914091 | 6.664429  | -1.166321 |
| 104 | C  | -3.651879 | 4.617854  | -0.382060 |
| 105 | H  | -3.818478 | 3.728366  | 0.223397  |
| 106 | H  | -4.433665 | 4.707381  | -1.143782 |
| 107 | H  | -3.678244 | 5.505508  | 0.256024  |
| 108 | C  | 0.327520  | 2.908370  | -2.805236 |
| 109 | H  | 0.809422  | 2.223005  | -2.103116 |
| 110 | H  | 1.095585  | 3.484783  | -3.324597 |
| 111 | C  | -1.595500 | 1.451389  | -3.413533 |
| 112 | C  | -0.296680 | 2.166748  | -5.176764 |
| 113 | H  | 0.509203  | 2.681350  | -5.674609 |
| 114 | C  | -1.336487 | 1.439888  | -5.689974 |
| 115 | H  | -1.591697 | 1.215923  | -6.713466 |
| 116 | C  | -3.392591 | 0.286016  | -4.785240 |
| 117 | H  | -3.544480 | -0.392449 | -3.947002 |
| 118 | H  | -3.348718 | -0.287704 | -5.714833 |
| 119 | H  | -4.221124 | 0.999355  | -4.848671 |
| 120 | C  | -2.123257 | -1.219344 | 3.021931  |
| 121 | C  | -1.199964 | -1.988078 | 4.986192  |
| 122 | H  | -0.528288 | -2.545249 | 5.619245  |
| 123 | C  | -2.262072 | -1.186953 | 5.307586  |
| 124 | H  | -2.672353 | -0.928462 | 6.270939  |
| 125 | C  | -4.040215 | 0.102763  | 4.062906  |
| 126 | H  | -4.782112 | -0.318195 | 4.748328  |
| 127 | H  | -4.439211 | 0.115026  | 3.050073  |
| 128 | H  | -3.813211 | 1.128772  | 4.368742  |

|     |   |           |           |           |
|-----|---|-----------|-----------|-----------|
| 129 | C | -0.220410 | -2.803712 | 2.760275  |
| 130 | H | 0.395251  | -3.430323 | 3.408918  |
| 131 | H | 0.429893  | -2.153816 | 2.168411  |
| 132 | C | -2.002823 | -3.133492 | 1.054337  |
| 133 | C | -1.007222 | -5.060592 | 1.825349  |
| 134 | H | -0.334515 | -5.669549 | 2.407540  |
| 135 | C | -1.995715 | -5.420375 | 0.949342  |
| 136 | H | -2.327861 | -6.398300 | 0.638766  |
| 137 | C | -3.757649 | -4.241649 | -0.426385 |
| 138 | H | -3.428268 | -4.379807 | -1.460565 |
| 139 | H | -4.286553 | -3.292704 | -0.349271 |
| 140 | H | -4.426907 | -5.061174 | -0.148826 |
| 141 | C | -6.659168 | 0.541019  | 0.997666  |
| 142 | C | -8.509218 | 0.306661  | 2.346696  |
| 143 | H | -9.277584 | -0.204313 | 2.905088  |
| 144 | C | -8.286020 | 1.645425  | 2.165652  |
| 145 | H | -8.832781 | 2.497588  | 2.537222  |
| 146 | C | -6.668070 | 3.068006  | 0.833701  |
| 147 | H | -5.975941 | 2.884004  | 0.012383  |
| 148 | H | -6.163512 | 3.617622  | 1.635148  |
| 149 | H | -7.512233 | 3.659818  | 0.467696  |
| 150 | C | -7.395675 | -1.802722 | 1.381530  |
| 151 | H | -6.459605 | -2.179396 | 1.802415  |
| 152 | H | -8.238202 | -2.318037 | 1.846154  |
| 153 | C | -6.557485 | -1.350777 | -0.915740 |
| 154 | C | -8.344336 | -2.796222 | -0.794059 |
| 155 | H | -9.107750 | -3.400903 | -0.330524 |
| 156 | C | -8.059367 | -2.588199 | -2.117158 |
| 157 | H | -8.539732 | -2.977022 | -3.001090 |
| 158 | C | -6.444461 | -1.150426 | -3.436724 |
| 159 | H | -5.975732 | -1.945060 | -4.026276 |
| 160 | H | -5.713005 | -0.379201 | -3.198213 |
| 161 | H | -7.261605 | -0.707872 | -4.014744 |

#### 4. References

- 1 Y. Maeda, H. Hashimoto, I. Kinoshita and T. Nishioka, *Inorg. Chem.*, 2014, **53**, 661-663.
- 2 *CrystalClear*, Rigaku Corporation, 1999; *CrystalClear Software User's Guide*, Molecular Structure Corporation, 2000; J. W. Pflugrath, *Acta Cryst.*, 1999, **D55**, 1718–1725.
- 3 *SIR97*: A. Altomare, M. Burla, M. Camalli, G. Cascarano, C. Giacovazzo, A. Guagliardi, A. Moliterni, G. Polidori, R. Spagna, *J. Appl. Cryst.*, 1999, **32**, 115–119.
- 4 *SHELXL97*: G. M. Sheldrick, *Program for crystal structure refinement*; University of Göttingen: Göttingen, Germany, 1997.
- 5 *CrystalStructure 4.2.2*: Crystal Structure Analysis Package, Rigaku Corporation (2000–2016), Tokyo 196-8666, Japan.
- 6 Gaussian 03 (Revision E.01), M. J. Frisch, G. W. Trucks, H. B. Schlegel, G. E. Scuseria, M. A. Robb, J. R. Cheeseman, J. A. Montgomery, Jr., T. Vreven, K. N. Kudin, J. C. Burant, J. M. Millam, S. S. Iyengar, J. Tomasi, V. Barone, B. Mennucci, M. Cossi, G. Scalmani, N. Rega, G. A. Petersson, H. Nakatsuji, M. Hada, M. Ehara, K. Toyota, R. Fukuda, J. Hasegawa, M. Ishida, T. Nakajima, Y. Honda, O. Kitao, H. Nakai, M. Klene, X. Li, J. E. Knox, H. P. Hratchian, J. B. Cross, V. Bakken, C. Adamo, J. Jaramillo, R. Gomperts, R. E. Stratmann, O. Yazyev, A. J. Austin, R. Cammi, C. Pomelli, J. W. Ochterski, P. Y. Ayala, K. Morokuma, G. A. Voth, P. Salvador, J. J. Dannenberg, V. G. Zakrzewski, S. Dapprich, A. D. Daniels, M. C. Strain, O. Farkas, D. K. Malick, A. D. Rabuck, K. Raghavachari, J. B. Foresman, J. V. Ortiz, Q. Cui, A. G. Baboul, S. Clifford, J. Cioslowski, B. B. Stefanov, G. Liu, A. Liashenko, P. Piskorz, I. Komaromi, R. L. Martin, D. J. Fox, T. Keith, M. A. Al-Laham, C. Y. Peng, A. Nanayakkara, M. Challacombe, P. M. W. Gill, B. Johnson, W. Chen, M. W. Wong, C. Gonzalez and J. A. Pople, Gaussian, Inc., Pittsburgh PA, **2004**.
